# Supplementary material for: Current rectification by a single ZnS nanorod probed using a scanning tunneling microscopic technique
Source: Royal Society of Chemistry journal article supplement (doi:10.1039/c3tc31850h), 2013-11-07
Supplement: c3tc31850h.pdf [file c3tc31850h.pdf]

## Supplementary Information

### Current rectification by a single ZnS nanorod probed using scanning tunneling microscopic technique

Umamahesh Thupakula,<sup>a</sup> Jayanta K. Bal,<sup>a</sup> Amit Dalui,<sup>a</sup> Anupam Debangshi,<sup>a</sup> D. D. Sarma<sup>b</sup> and Somobrata Acharya<sup>\*a</sup>

<sup>a</sup>Centre for Advanced Materials, Indian Association for the Cultivation of Science, Kolkata 700032, India

<sup>b</sup>Solid State and Structural Chemistry Unit & Centre for Condensed Matter Theory, Indian Institute of Science, Bangalore 560012, India

\* Corresponding author E-mail: [camsa2@iacs.res.in](mailto:camsa2@iacs.res.in)

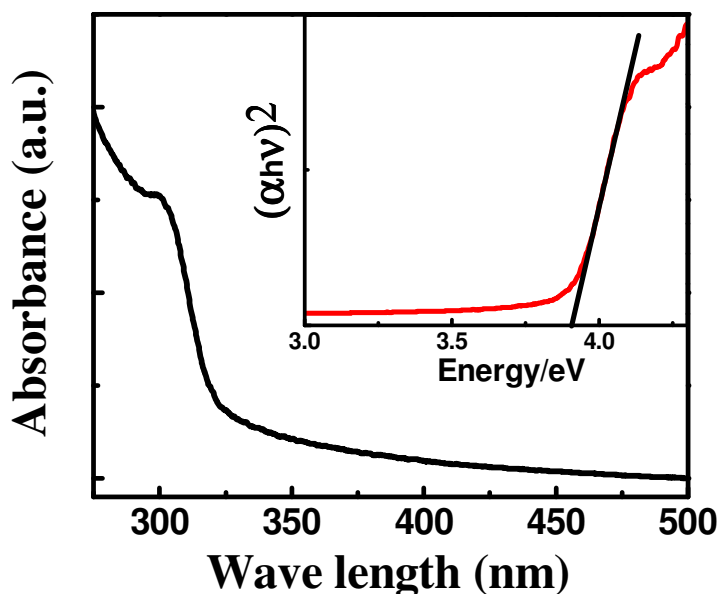

**Fig. S1** UV-vis absorption spectrum of ZnS nanorods in chloroform suspension taken by using a Shimadzu UV-2550 spectrometer. The band gap of ZnS nanorods was analyzed from UV-vis spectrum by calculating the absorption coefficient ( $\alpha$ ). The band gap ( $E_g$ ) is calculated using the relation,  $(\alpha h\nu)^2 = E_g - h\nu$ . The plot of  $(\alpha h\nu)^2$  versus  $h\nu$  (energy) is shown in the inset. Extrapolating the tangent to the energy axis reveals the band gap of 3.9 eV for ZnS nanorods. The band gap value extracted from the UV-vis absorption spectrum of nanorods (3.9 eV) which are larger than the bulk band gap of ZnS suggesting the strong confinement of charge carriers in nanorods.

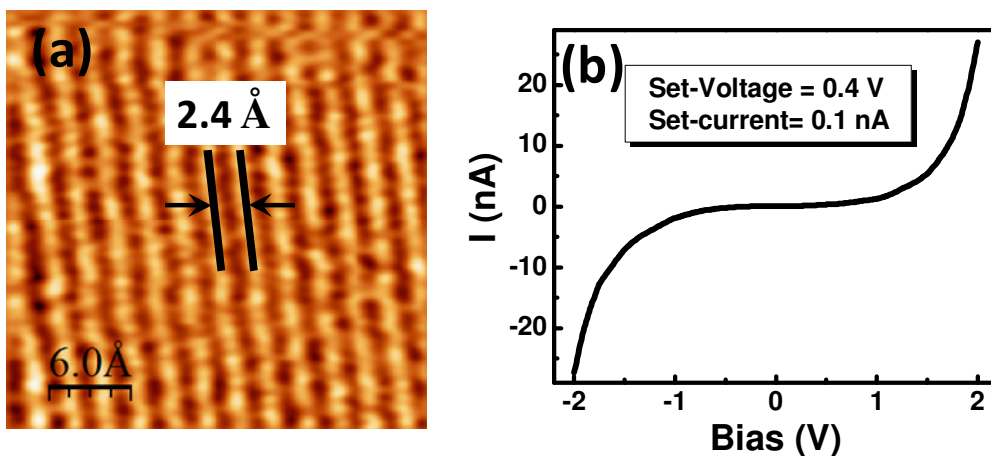

**Fig. S2** (a) Atomic scale resolution of HOPG substrate obtained in STM at set-voltage, 0.4 V and set-current, 0.1 nA. The figure shows the atomic lines of surface layer of HOPG having inter-atomic spacing of 2.4 Å. (b) STS data acquired on HOPG showing symmetric I-V behavior in positive and negative bias. Rectification Ratio (RR) value calculated from the current-voltage curve is  $\sim 1$  indicating no rectification behavior is originating from the substrate itself.
